# Supplementary material for: Two Facile Aniline-Based Hypercrosslinked Polymer Adsorbents for Highly Efficient Iodine Capture and Removal
Source: MDPI journal article supplement (doi:10.3390/ijms24010370), 2022-12-26
Supplement: s1 [file s1]

## **Electronic Supplementary Information**

# **Two Facile Aniline-Based Hypercrosslinked Polymer Adsorbents for Highly Efficient Iodine Capture and Removal**

Biyang Liu, Chaochao Mao, Zian Zhou, Qiannan Wang, Xiong Zhou, Zhijie Liao, Ran Deng, Defei Liu,

Jingzi Beiyuan, Daofei Lv, Jiesan Li, Liyun Huang, \* Xin Chen, Wenbing Yuan\*

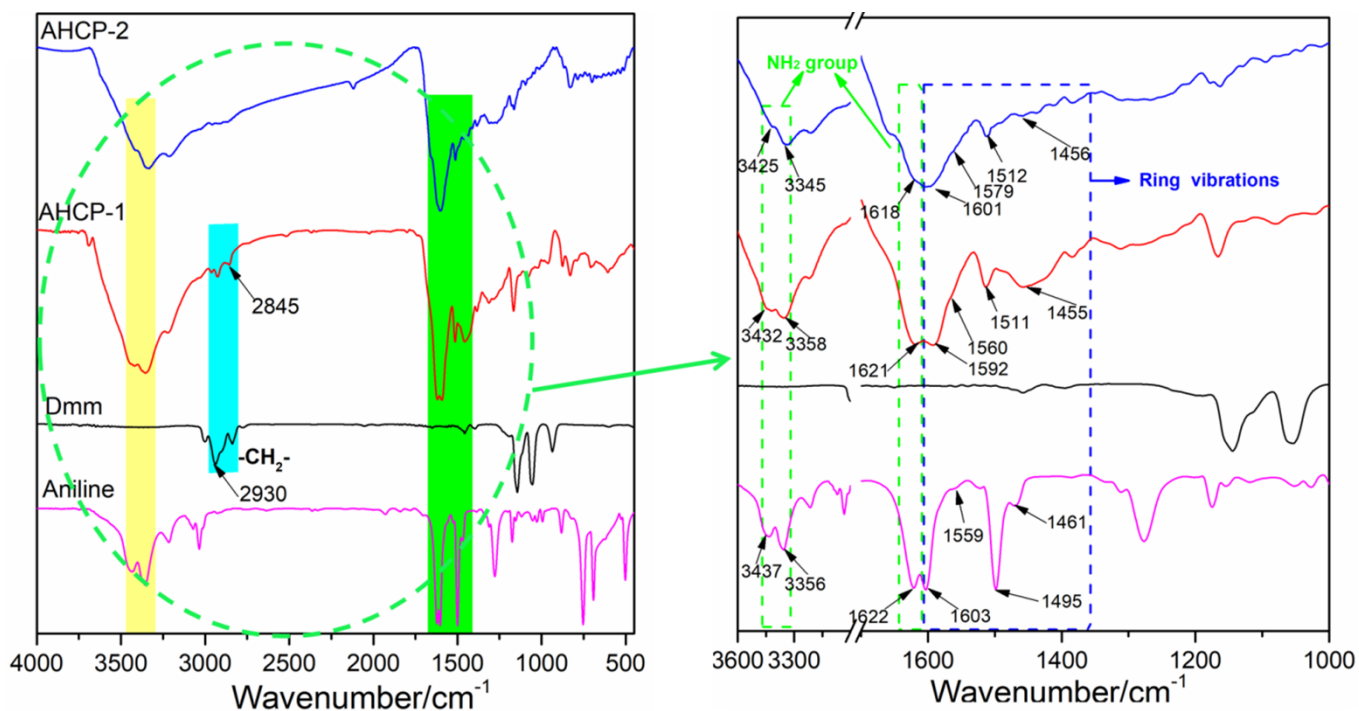

**Fig. S1.** FT-IR spectra of Aniline(purple), dimethoxymethane (Dmm) (black), AHCP-1(red), and AHCP-2(blue).

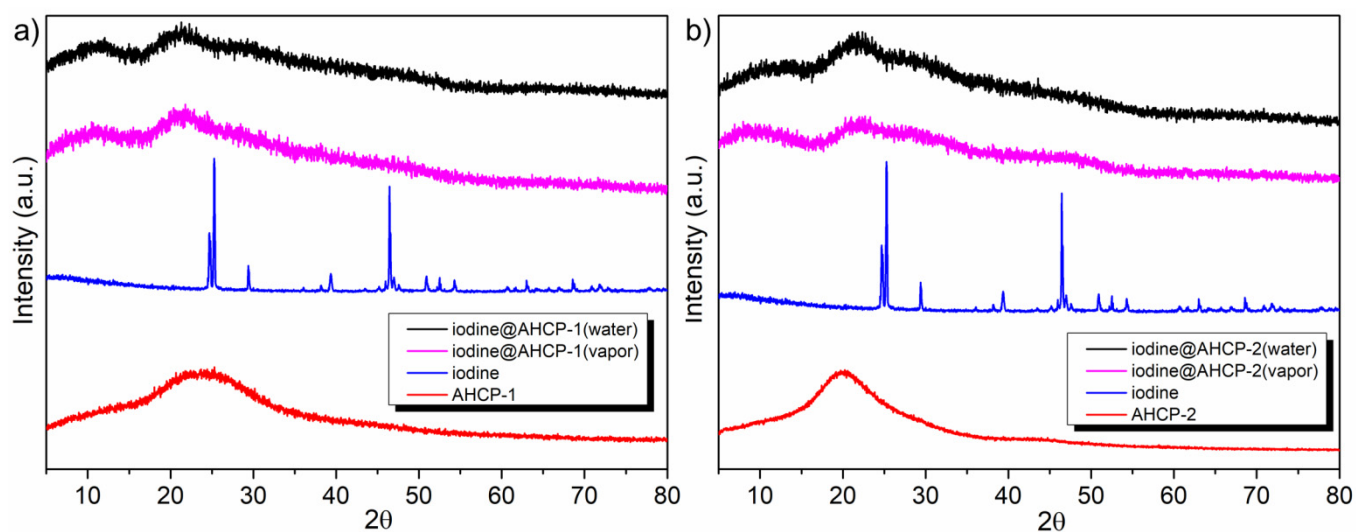

**Fig. S2.** Comparison of PXRD patterns of (a) AHCP-1 and (b) AHCP-2 before and after iodine adsorption.

**Table S1.** Iodine adsorption capacity of reported amorphous adsorbents in iodine aqueous solution

| No. | Adsorbent                                                                    | BET(m <sup>2</sup> /g) | Iodine<br>adsorption<br>capacity<br>(wt%) | Reference (DOI)                 |
|-----|------------------------------------------------------------------------------|------------------------|-------------------------------------------|---------------------------------|
| 1   | AHCP-1                                                                       | 14.4                   | 250                                       | This work                       |
| 2   | Fe <sub>3</sub> O <sub>4</sub> @PPy                                          | 30                     | 162.7                                     | 10.1016/j.jhazmat.2017.10.065   |
| 3   | AHCP-2                                                                       | 75.2                   | 160                                       | This work                       |
| 4   | BC@Dopa-ZIF                                                                  | 1453.3                 | 131                                       | 10.1021/acs.cgd.7b01360         |
| 5   | Activated Bamboo                                                             | -                      | 118                                       | 10.1016/S0008-6223(00)00230-X   |
| 6   | Activated Salsola<br>vermiculata plant                                       | -                      | 117.8                                     | 10.1016/j.w atres.2014.10.021   |
| 7   | Activated Coconut<br>shell                                                   | -                      | 117                                       | 10.1016/S0008-6223(00)00230-X   |
| 8   | bituminous coal-<br>based granular<br>(GAC-B)                                | 960                    | 101.6                                     | 10.1016/S0008-6223(99)00180-3   |
| 9   | Activated Japanese<br>cedar                                                  | 590                    | 95                                        | 10.1016/S0008-6223(00)00230-X   |
| 10  | activated carbon the<br>granular carbon<br>made of coconut<br>shells (GAC-C) | 940                    | 94                                        | 10.1016/S0008-6223(99)00180-3   |
| 11  | THPS-C                                                                       | 3125                   | 92.6                                      | 10.1002/admi.201900249          |
| 12  | The activated carbon<br>fabric made from<br>PAN(ACF)                         | 970                    | 88.9                                      | 10.1016/S0008-6223(99)00180-3   |
| 13  | Activated Vinylidene<br>film                                                 | 714                    | 85                                        | 10.1016/S0008-6223(00)00230-X   |
| 14  | Activated Evergreen<br>oak                                                   | -                      | 85                                        | 10.1016/S0008-6223(00)00230-X   |
| 15  | Merck activated<br>carbon                                                    | -                      | 20                                        | 10.1016/j.w atres.2014.10.021   |
| 16  | n-CF@OCDs                                                                    | -                      | 19.01                                     | 10.1016/j.jhazmat.2019.01.037   |
| 17  | im-SCMNPs                                                                    | -                      | 14.1                                      | 10.1007/BF03353693              |
| 18  | n-CF                                                                         | -                      | 2.81                                      | 10.1016/j.jhazmat.2019.01.037   |
| 19  | PHCP@PES                                                                     | 13.75                  | 18                                        | 10.1016/j.jhazmat.2022.128859   |
| 20  | CTF-DPA                                                                      | 943                    | 66.7                                      | 10.1016/j.jece.2022.107805      |
| 21  | P-TzTz                                                                       | 137                    | 49.09                                     | 10.1016/j.micromeso.2020.110161 |

**Table S2.** Iodine adsorption capacity of reported amorphous adsorbents in iodine vapor

| No. | Adsorbent   | BET<br>(m <sup>2</sup> /g) | Iodine<br>adsorption<br>capacity<br>(wt%) | Reference (DOI)                 |
|-----|-------------|----------------------------|-------------------------------------------|---------------------------------|
| 1   | AHCP-1      | 14.4                       | 536                                       | This work                       |
| 2   | AHCP-2      | 75.2                       | 596                                       | This work                       |
| 3   | TTPPA       | 512.39                     | 490                                       | 10.1039/c7ta08251g              |
| 4   | TTPB        | 222                        | 443                                       | 10.1039/C7TA00590C              |
| 5   | CTF-DPA     | 943                        | 512                                       | 10.1016/j.jece.2022.107805      |
| 6   | HCP         | 584                        | 460                                       | 10.1016/j.seppur. 2018.09.041   |
| 7   | BPPOC       | -                          | 564                                       | 10.1021/jacs.2c03959            |
| 8   | CMP-4       | 9.5                        | 208                                       | 10.1002/ange.202015162          |
| 9   | PHF-1-Ct    | 690                        | 405                                       | 10.1039/C8CC07529H              |
| 10  | C-poly-15   | 96.16                      | 574                                       | 10.1039/D1SC05361B              |
| 11  | PHCP@PES    | 13.75                      | 77                                        | 10.1016/j.jhazmat.2022.128859   |
| 12  | P-TzTz      | 137                        | 326                                       | 10.1016/j.micromeso.2020.110161 |
| 13  | CSU-CPOPs-1 | 1032                       | 494                                       | 10.1021/acsami.9b07679          |
| 14  | FcTz-POP    | -                          | 264                                       | 10.1016/j.micromeso.2021.110929 |
| 15  | C-poly-15   | 96.16                      | 574                                       | 10.1039/d1sc05361b              |
| 16  | PZ-HCP-1:4  | 209                        | 333                                       | 10.1016/j.micromeso.2022.112157 |
| 17  | ImCMP-1     | 356.9                      | 236                                       | 10.1016/j.micromeso.2022.111871 |
| 18  | TTDAB       | 1.643                      | 313                                       | 10.1039/c7ta08251g              |
| 19  | Tm-MTDAB    | 2.778                      | 304                                       | 10.1039/c7ta08251g              |
| 20  | CalPOF-1    | 303                        | 477                                       | 10.1021/acssuschemeng.8b05203   |
| 21  | CalPOF-2    | 154                        | 406                                       | 10.1021/acssuschemeng.8b05203   |
| 22  | CalPOF-3    | 91                         | 353                                       | 10.1021/acssuschemeng.8b05203   |
| 23  | NDB-H       | 116.93                     | 443                                       | 10.1002/asia.201800698          |
| 24  | NDB-S       | 56.45                      | 425                                       | 10.1002/asia.201800698          |
| 25  | ADB-HS      | 148.2                      | 345                                       | 10.1002/asia.201800698          |
| 26  | ADB-S       | 41.53                      | 342                                       | 10.1002/asia.201800698          |
| 27  | POP-1       | 12                         | 357                                       | 10.1016/j.jhazmat.2017.05.041   |
| 28  | POP-2       | 41                         | 382                                       | 10.1016/j.jhazmat.2017.05.041   |
| 29  | HCMP-1      | 430                        | 159                                       | 10.1021/acs.macromol.6b00901    |
| 30  | HCMP-2      | 153                        | 281                                       | 10.1021/acs.macromol.6b00901    |
| 31  | HCMP-3      | 82                         | 316                                       | 10.1021/acs.macromol.6b00901    |

|    |          |       |      |                                               |
|----|----------|-------|------|-----------------------------------------------|
| 32 | HCMP-4   | 28    | 222  | 10.1021/acs.macromol.6b00901                  |
| 33 | CalP4_Li | 445   | 312  | 10.1021/acs.chemmater.7b03449                 |
| 34 | TBIM     | 8.12  | 943  | 10.1039/c9ta11982e                            |
| 35 | AzoPPN   | 400   | 290  | 10.1002/chem.201602337                        |
| 36 | Azo-Trip | 510.4 | 238  | 10.1039/C5PY01671A                            |
| 37 | CMP-E1   | 2150  | 215  | 10.1002/anie.201503362                        |
| 38 | PAF-21   | 1520  | 152  | 10.1002/anie.201503362                        |
| 39 | PAF-23   | 82    | 271  | 10.1002/anie.201503362                        |
| 40 | PAF-24   | 136   | 276  | 10.1002/anie.201503362                        |
| 41 | PAF-25   | 262   | 260  | 10.1002/anie.201503362                        |
| 42 | NAPOP-1  | 657   | 206  | 10.1002/pola.28028                            |
| 43 | NAPOP-2  | 458   | 205  | 10.1002/pola.28028                            |
| 44 | NAPOP-3  | 702   | 241  | 10.1002/pola.28028                            |
| 45 | NAPOP-4  | 626   | 265  | 10.1002/pola.28028                            |
| 46 | CMPN-1   | 230   | 97   | 10.1039/C4TA04235B                            |
| 47 | CMPN-2   | 339   | 110  | 10.1039/C4TA04235B                            |
| 48 | CMPN-3   | 1368  | 208  | 10.1039/C4TA04235B                            |
| 49 | NiP-CMP  | 2630  | 202  | 10.1039/c4cc01783h                            |
| 50 | PAF-1    | 5600  | 186  | 10.1039/C4TA00049H,<br>10.1002/anie.200904637 |
| 51 | JUC-Z2   | 2081  | 144  | 10.1039/C4TA00049H,<br>10.1039C1JM12545A      |
| 52 | CMOP-1   | 431   | 160  | 10.3390/molecules23071732                     |
| 53 | CMOP-2   | 406   | 93   | 10.3390/molecules23071732                     |
| 54 | NTP      | 1067  | 180  | 10.1021/acsmacrolett.6b00567                  |
| 55 | AK-1     | 1634  | 237  | 10.1016j.jhazmat.2016.09.015                  |
| 56 | AK-2     | 2751  | 262  | 10.1016j.jhazmat.2016.09.015                  |
| 57 | AK-3     | 2016  | 253  | 10.1016j.jhazmat.2016.09.015                  |
| 58 | PAN1     | 618   | 133  | 10.1002app.46106                              |
| 59 | PAN2     | 542   | 245  | 10.1002app.46106                              |
| 60 | PAN3     | 194   | 281  | 10.1002app.46106                              |
| 61 | PAN4     | 522   | 237  | 10.1002app.46106                              |
| 62 | PAN5     | 439   | 189  | 10.1002app.46106                              |
| 63 | Cg-5P    | 840   | 8.7  | 10.1039c1ra00351h                             |
| 64 | Cg-5C    | 1290  | 23.6 | 10.1039c1ra00351h                             |
| 65 | SCMP-1   | 418   | 188  | 10.1021acsami.6b06569                         |

|    |                     |        |     |                               |
|----|---------------------|--------|-----|-------------------------------|
| 66 | SCMP-2              | 855    | 220 | 10.1021/acsami.6b06569        |
| 67 | SCMP-II             | 119.76 | 354 | 10.1039/C6CC05188J            |
| 68 | BQCMP-1             | 422    | 151 | 10.1002/mame.201600138        |
| 69 | BQCMP-2             | 123    | 161 | 10.1002/mame.201600138        |
| 70 | FCMP-600@1          | 551    | 108 | 10.1038/s41598-017-14598-0    |
| 71 | FCMP-600@2          | 636    | 141 | 10.1038/s41598-017-14598-0    |
| 72 | FCMP-600@3          | 629    | 90  | 10.1038/s41598-017-14598-0    |
| 73 | FCMP-600@4          | 88     | 111 | 10.1038/s41598-017-14598-0    |
| 74 | NCMP1               | 58     | 215 | 10.1021/acsami.7b09553        |
| 75 | NCMP2               | 280    | 186 | 10.1021/acsami.7b09553        |
| 76 | NCMP3               | 485    | 161 | 10.1021/acsami.7b09553        |
| 77 | NOP-54              | 1178   | 202 | 10.1016/j.ccej.2017.10.133    |
| 78 | NiMoS<br>chalcogels | 490    | 225 | 10.1021/acs.chemmater.5b00413 |
| 79 | MelPOP-2            | 50.5   | 262 | 10.1039/C8CC04242J            |
| 80 | PSIF-1a             | 320    | 485 | 10.1021/acsami.8b03023        |

## Sorption kinetics

### Pseudo first order kinetic model

The linear form of pseudo first order kinetic model is expressed by the following equation.

$$\ln(q_e - q_t) = \ln q_e - k_1 t$$

Where  $q_e$  and  $q_t$  are the amount of iodine adsorbed at time  $t$  and equilibrium (g/g),  $k_1$  is the pseudo-first-order rate constant of adsorption process ( $\text{min}^{-1}$ )

### Pseudo second order kinetic model

The linear form of pseudo second order kinetic model is expressed by the following equation.

$$\frac{t}{q_t} = \frac{1}{k_2 q_e^2} + \frac{1}{q_e} t$$

Where  $q_e$  and  $q_t$  are the amount of iodine adsorbed at time  $t$  and equilibrium (mg/g),  $k_2$  is the pseudo-first-order rate constant of adsorption process ( $\text{g/mg min}$ )

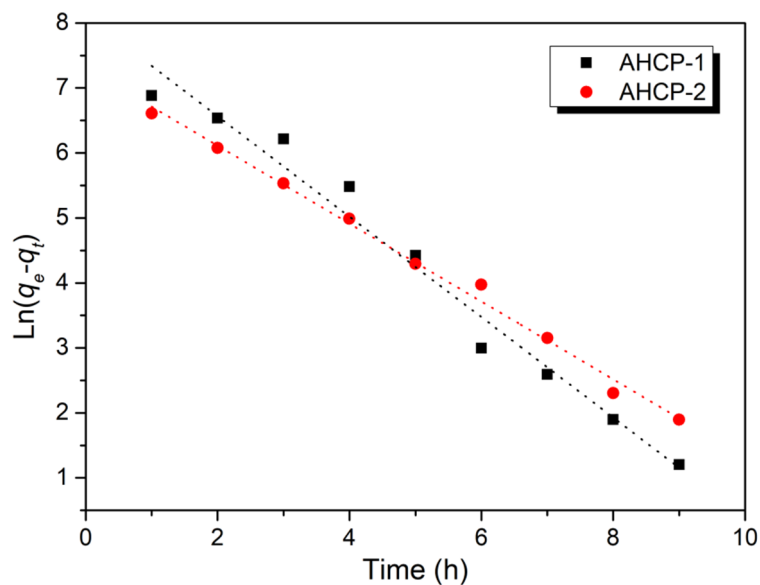

**Fig. S3.** Plots of pseudo-first order kinetics for the adsorption of I<sub>2</sub> aqueous solution on AHCP-1 and AHCP-2.

**Table S3.** Parameters of the pseudo first order and pseudo second order kinetic models extracted from experimental data for AHCP-1 and AHCP-2.

|                            |        | Intercept | $q_e$ (g/g) | $k_1(1/h)$          | $R^2$  |
|----------------------------|--------|-----------|-------------|---------------------|--------|
| <b>pseudo-first order</b>  | AHCP-1 | 8.1118    | 3.33        | 0.7729              | 0.9762 |
|                            | AHCP-2 | 7.3119    | 1.49        | 0.5994              | 0.9939 |
|                            |        | Intercept | $q_e$ (g/g) | $K_2(g/mg \cdot h)$ | $R^2$  |
| <b>Pseudo second order</b> | AHCP-1 | 0.0003    | 2.33        | 0.0006              | 0.9972 |
|                            | AHCP-2 | 0.0006    | 1.67        | 0.0005              | 0.9990 |

## Sorption equilibrium

### Langmuir isotherm

The equation of Langmuir is expressed by the following equation.

$$\frac{1}{q_e} = \frac{1}{q_m} + \frac{1}{k_L q_m C_e}$$

### Freundlich isotherm

The equation of Freundlich is expressed by the following equation.

$$\ln q_e = \ln k_F + \frac{1}{n} \ln C_e$$

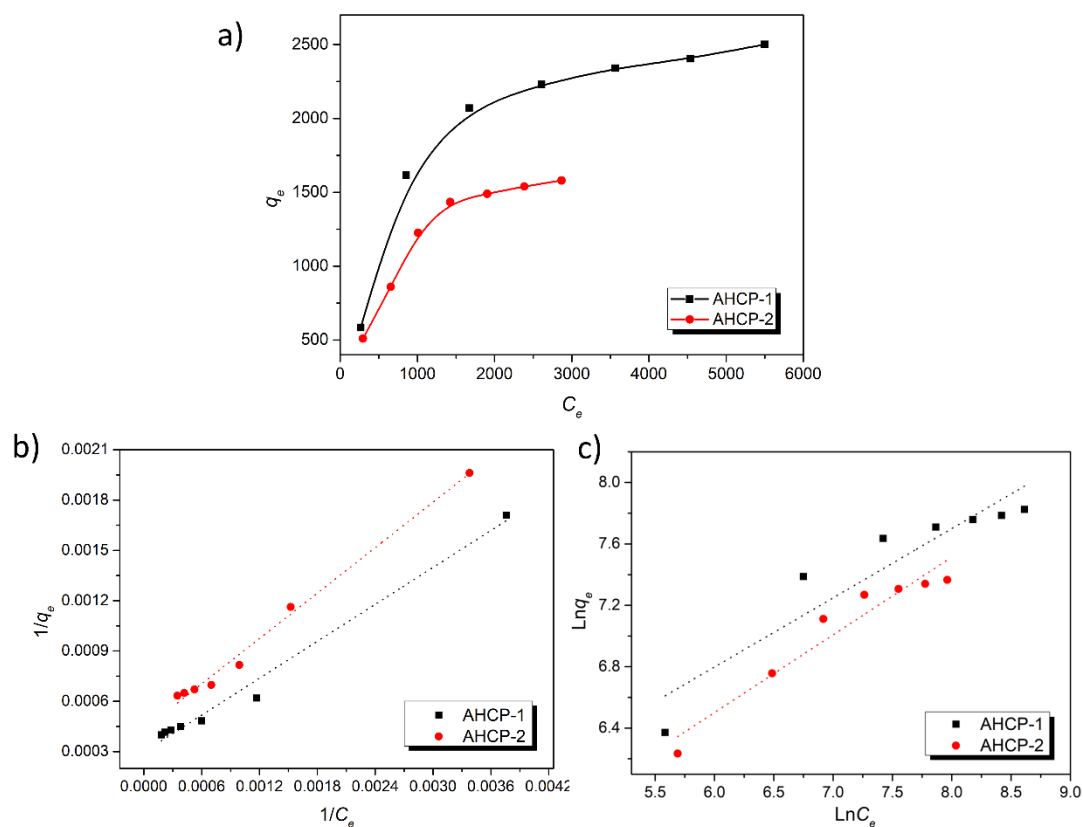

**Fig. S4.** (a) Adsorption Isotherm iodine onto AHCPs. (b) Plots of Langmuir Isotherms for the adsorption of  $I_2$  aqueous solution on AHCP-1 and AHCP-2. (c) Plots of **Freundlich** Isotherms for the adsorption of  $I_2$  aqueous solution on AHCP-1 and AHCP-2.

**Table S4.** Parameters of the different isotherm models extracted from experimental adsorption isotherms data for AHCP-1 and AHCP-2.

|        | Langmuir isotherm |                    |        | Freundlich isotherm |        |        |
|--------|-------------------|--------------------|--------|---------------------|--------|--------|
|        | $Q_m(\text{g/g})$ | $k_L(1/\text{mg})$ | $R^2$  | $k_F(\text{mg/g})$  | n      | $R^2$  |
| AHCP-1 | 2.70              | 0.0011             | 0.9872 | 59.9074             | 2.2178 | 0.8766 |
| AHCP-2 | 2.22              | 0.0010             | 0.9922 | 31.9317             | 1.9751 | 0.9330 |



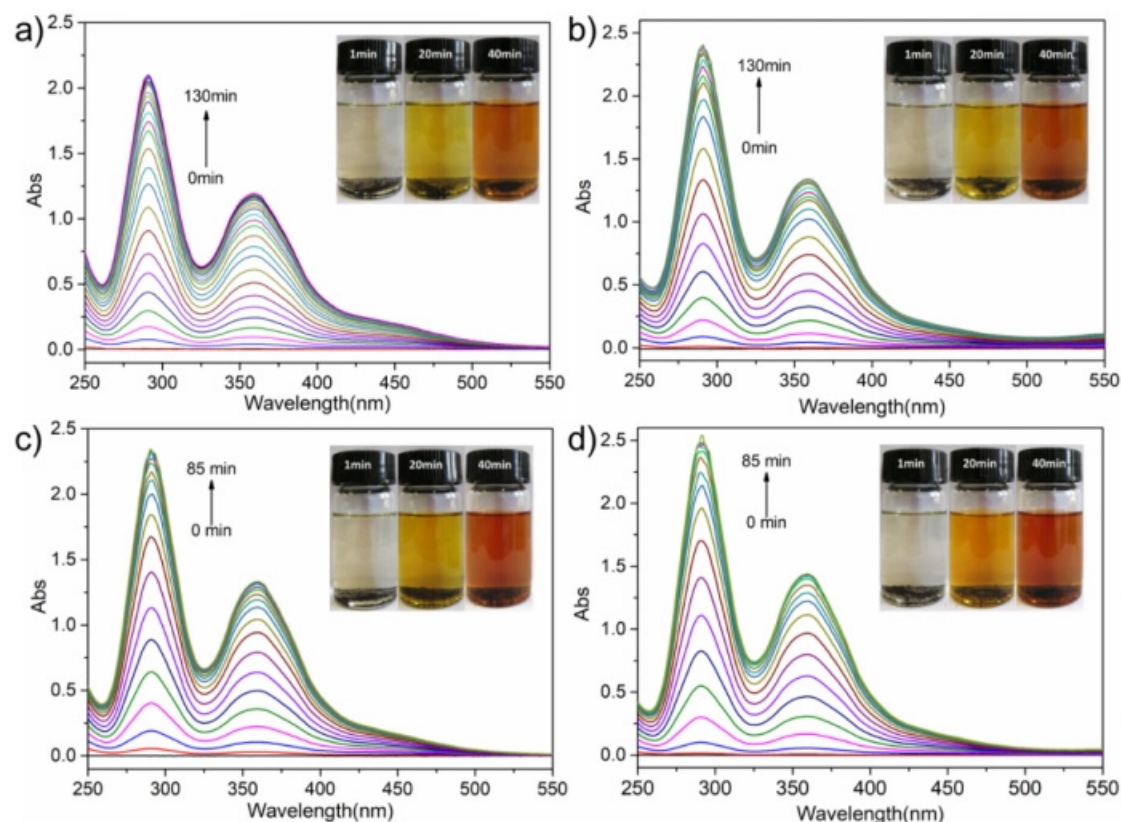

**Fig. S5.** Time-dependent UV-vis absorption of iodine@AHCPs in methanol. (a) iodine@AHCP-1(water) (10mg) in MeOH (45mL). (b) iodine@AHCP-2(water) (10mg) in MeOH (45mL). (c) iodine@AHCP-1(vapor) (10mg) in MeOH (80mL). (d) iodine@AHCP-2 (vapor) (10mg) in MeOH (80mL). Insets: photographs show color change of iodine enrichment at various times.

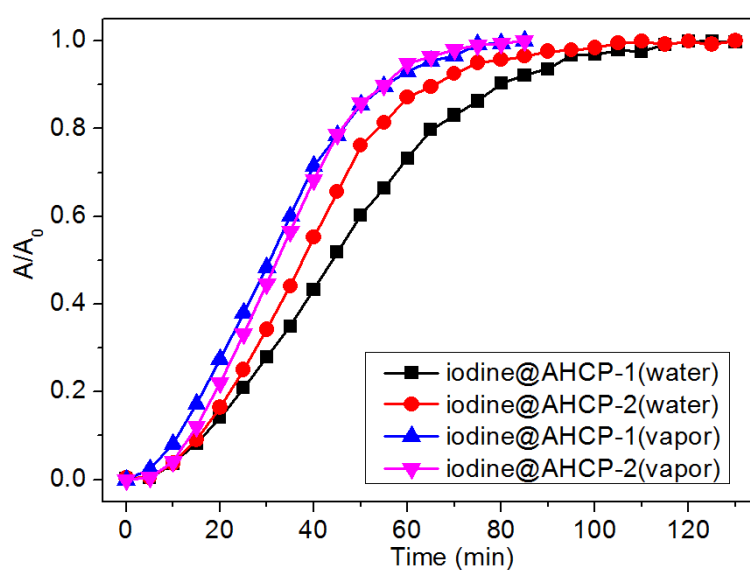

**Fig. S6.** Iodine desorption efficiencies at various times of iodine@AHCP-1(water), iodine@AHCP-2(water), iodine@AHCP-1(vapor), iodine@AHCP-2(vapor) monitored at 291nm.

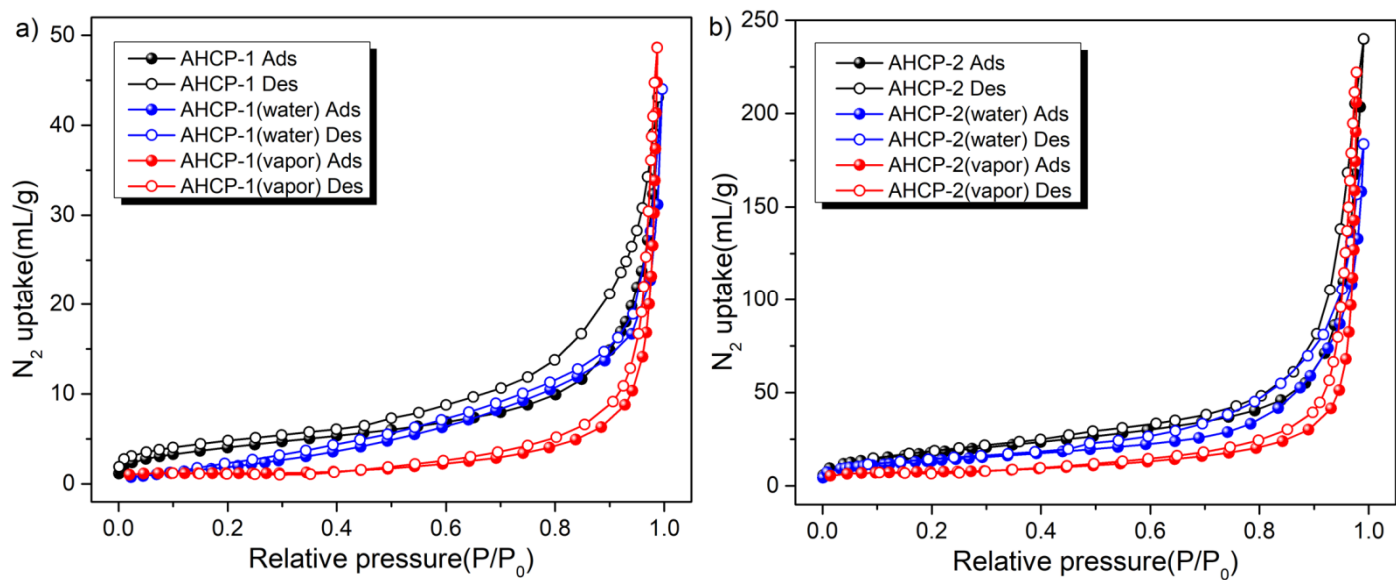

**Fig. S7.** BET curve after the first adsorption-desorption of iodine by AHCPs.

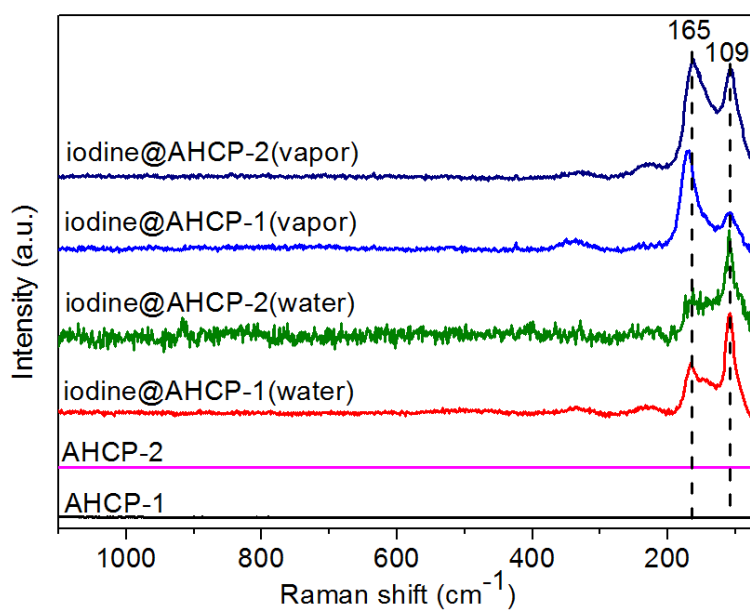

**Fig. S8.** Raman spectra of AHCPs, iodine@AHCPs(water) and iodine@AHCPs(vapor)

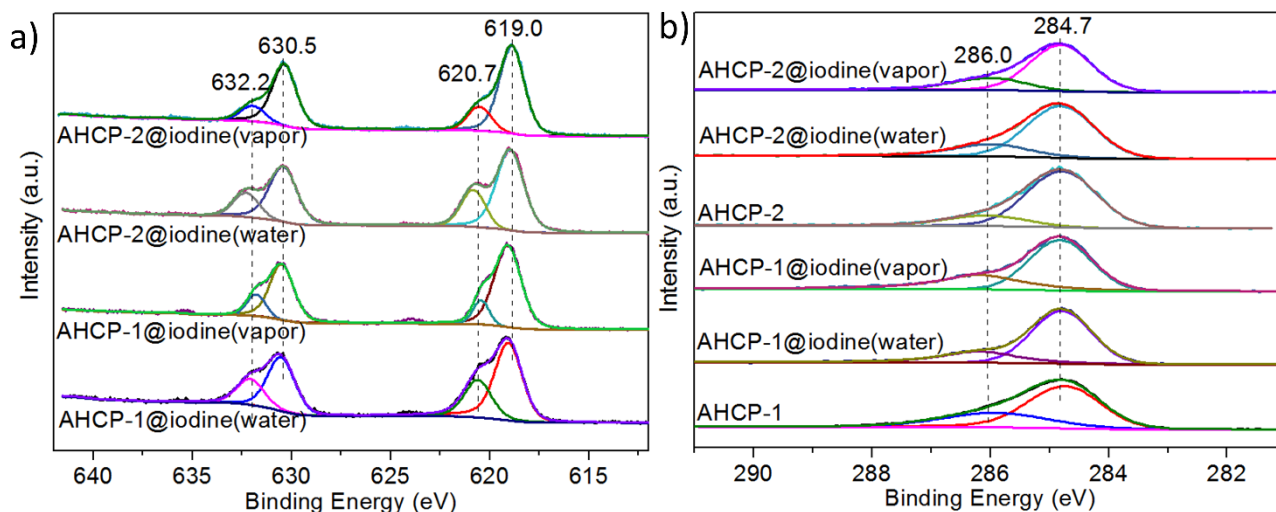

**Fig. S9.** XPS spectra of AHCPs, iodine@AHCPs(water) and iodine@AHCPs(vapor), (a) I 3d; (b) C 1s,

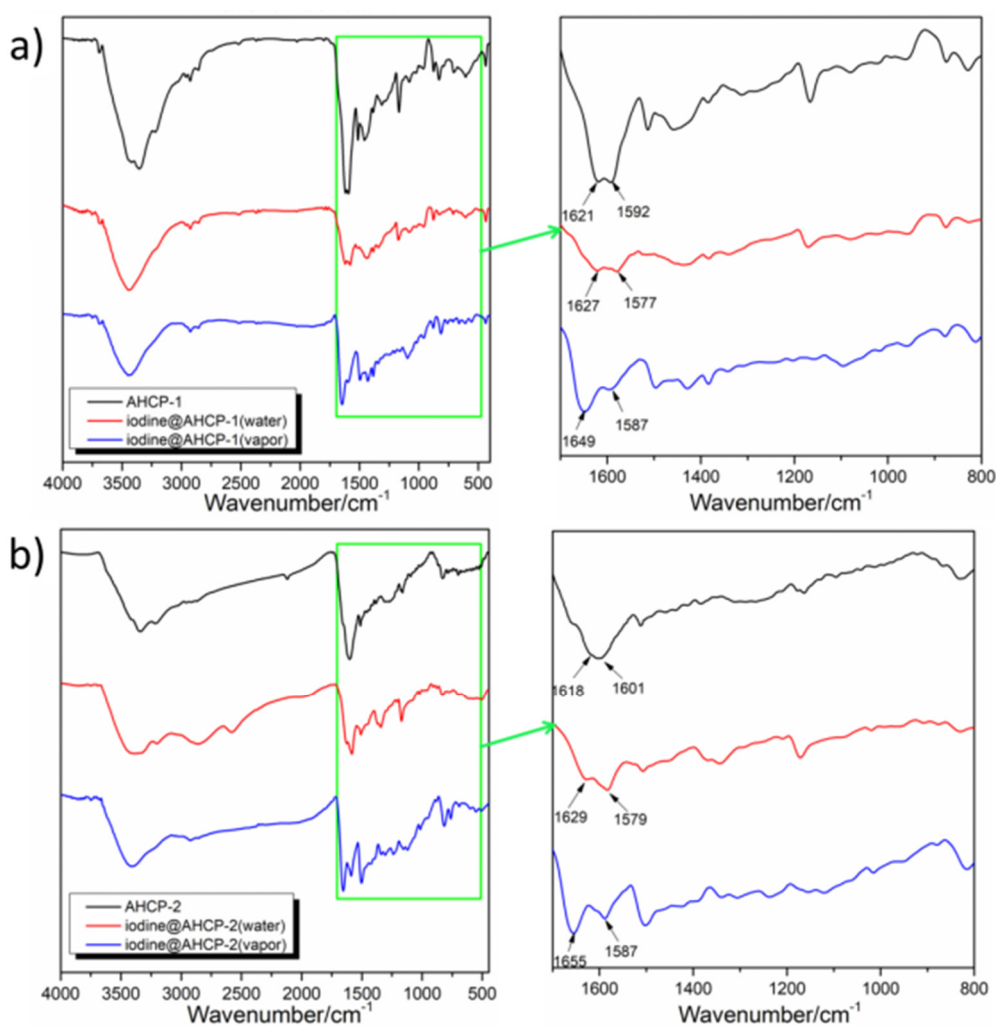

**Fig. S10.** (a) FT-IR spectra comparison of AHCP-1 before and after iodine adsorption; (b) FT-IR spectra comparison of AHCP-2 before and after iodine adsorption.
